# Supplementary material
Source: PubMed Central journal article supplement (PMC110706)
Supplement: nar_28_17_3233__1.pdf [file nar_28_17_3233__1.pdf]

## SUPPLEMENTARY MATERIAL

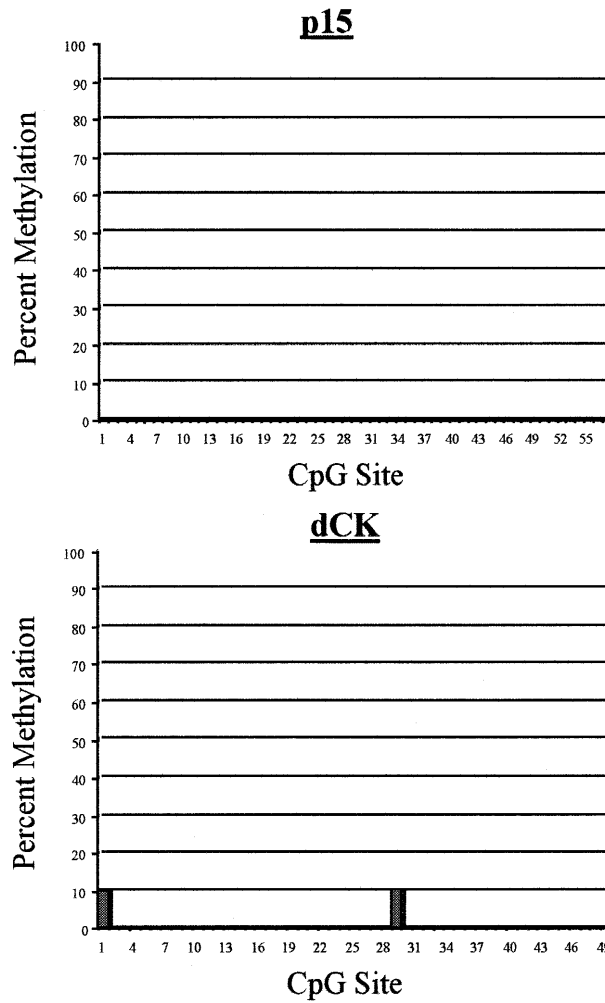

**Figure S1.** Methylation status of *p15* and *dCK* in UACC3199. Top, 57 CpG sites of the *p15* (GenBank accession no. S75756) CpG island were analyzed for methylation by sodium bisulfite genomic sequencing as described in the text using the following primers: primer 1 (nt 58–79), 5'-GGTTTTTGGTTTAGTTGAAAA-3'; primer 2 (nt 698–725), 5'-AACITAAACTCCTATACAAATCTACAT-3'; primer 3 (nt 90–116), 5'-TGTIGGTTGGTTTTTATTTGTTAGA-3'; primer 4 (nt 608–634), 5'-AAACCCTAAAACCCCAACTACCTAAAT-3'. Bottom, 49 CpG sites of the *dCK* (GenBank accession no. L07485) CpG island were analyzed using the following primers: primer 1 (nt 35–63), 5'-TTTGTTATTTTAAATAGGTTTATTAGAG-3'; primer 2 (nt 577–603), 5'-AATCCCCTCAAACTAACTAAAAAAA-3'; primer 3 (nt 130–155), 5'-GGTTTTTGGGGTTTATTTTTTTTTT-3'; primer 4 (nt 533–556), 5'-AAATAACCATTTCCTTAATCTTATA-3'. These results show that these CpG islands have remained unmethylated in UACC3199, similar to normal tissue.

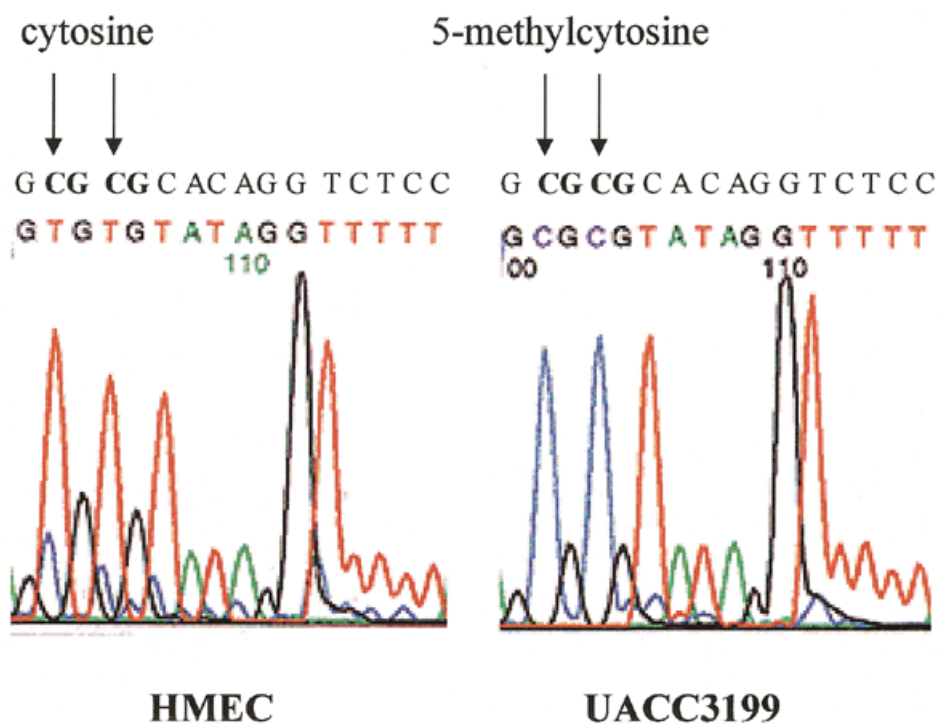

**Figure S2.** High resolution bisulfite sequencing data from HMEC and UACC3199. The sequence across the top of each electropherogram is the unmodified BRCA1 sequence from -568 to -553 relative to BRCA1 transcription start (GenBank accession no. U37574). HMEC is non-methylated at CpG -567 and -565 as each of these cytosines have been converted to thymidine in the bisulfite reaction (arrows). In contrast, UACC3199 is methylated at these CpG sites as the cytosines remain cytosine in the bisulfite reaction (arrows). All remaining non-methylated cytosines have been converted to thymidine in both HMEC and UACC3199.

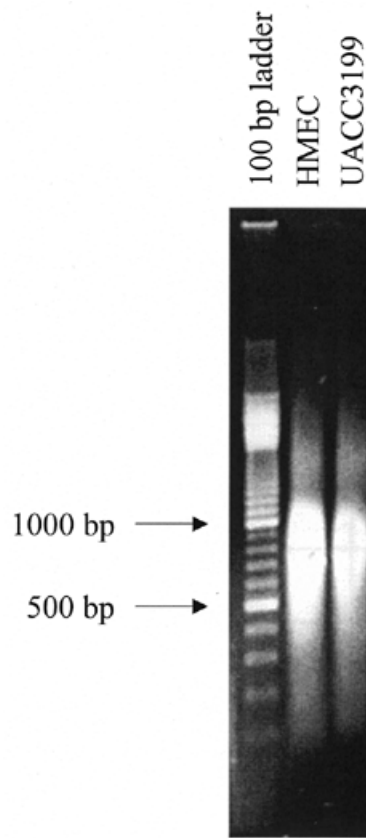

**Figure S3.** Shearing of protein-crosslinked DNA to small chromatin fragments. Genomic DNA was sonicated following formaldehyde cross-linking of proteins to genomic DNA to between 200 and 1000 bp in length. The gel shows that the bulk of the cross-linked genomic DNA is <1000 bp in both HMEC and UACC3199. This is, most likely, an overestimation of its true size considering protein bound DNA migrates slower than the naked DNA ladder as shown in this figure.
